# Supplementary material for: Ketorolac-Loaded PLGA-/PLA-Based Microparticles Stabilized by Hyaluronic Acid: Effects of Formulation Composition and Emulsification Technique on Particle Characteristics and Drug Release Behaviors
Source: MDPI journal article supplement (doi:10.3390/polym15020266), 2023-01-04
Supplement: s1 [file s1]

**Table S1.** Characteristics of blank microparticles prepared by PS and HSS techniques.

| Formulation    | d (0.5)      | d (0.9)       | Span        | ZP (mV)    |
|----------------|--------------|---------------|-------------|------------|
| PLGA (PS)      | 4.22 ± 0.05  | 13.99 ± 1.47  | 3.00 ± 0.31 | -5.0 ± 0.4 |
| PLGA/PLA (PS)  | 3.12 ± 0.04  | 21.62 ± 6.33  | 6.54 ± 2.03 | -5.0 ± 0.4 |
| PLA (PS)       | 7.72 ± 0.02  | 21.15 ± 0.31  | 2.47 ± 0.04 | -3.8 ± 0.2 |
| PLGA (HSS)     | 56.32 ± 0.20 | 89.32 ± 0.86  | 1.07 ± 0.01 | -9.8 ± 0.8 |
| PLGA/PLA (HSS) | 82.81 ± 0.44 | 134.61 ± 1.49 | 1.20 ± 0.01 | -5.4 ± 0.5 |
| PLA (HSS)      | 97.44 ± 0.17 | 147.62 ± 0.72 | 1.11 ± 0.01 | -4.7 ± 0.1 |

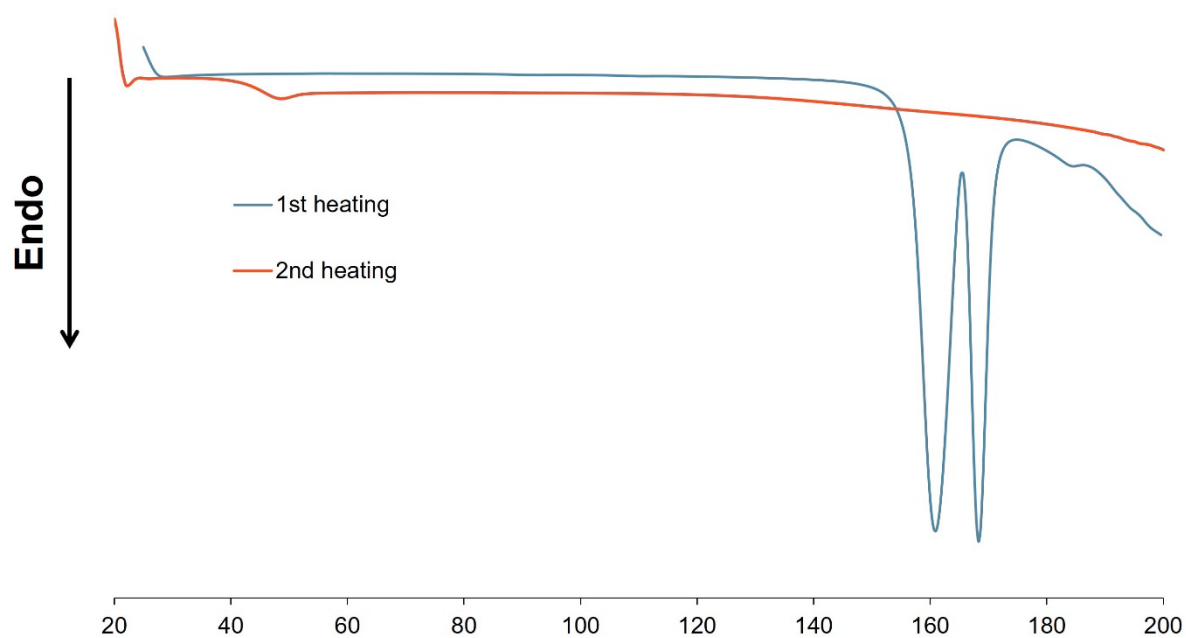

**Figure S1.** DSC thermogram of ketorolac after the first and second heating.
